# Supplementary material for: Infrared emitting lanthanide doped nanoparticles provide sensing capabilities to coronary implants
Source: Research Square preprint supplement (doi:10.21203/rs.3.rs-5965325/v1), 2025-04-28
Supplement: Supplementary file 1 [file 4ab770e70925660c342ca06e.docx]

**Supplementary Information**

**Infrared emitting lanthanide doped nanoparticles provide sensing capabilities to coronary implants**

Dongmei Qiu1, Paula Gutiérrez Gonzalez2, María del Carmen Iglesias de la Cruz3, Pablo Molina,4 Juan Pedro Cascales2, Ginés Lifante Pedrola1, Jose Marqués-Hueso5, Sergio Royuela6, Daniel Jaque*1,7 and Jorge Rubio Retama*2.

*1 nanomaterials for BIomaging Group (nanoBIG), Departamento de Física de Materiales, Facultad de Ciencias,* *Universidad Autónoma de Madrid, Madrid 28049, Spain*

*2 Departamento de Química en Ciencias Farmacéuticas, Universidad Complutense de Madrid, Madrid, 28040, Spain*

*3 nanomaterials for BIomaging Group (nanoBIG), Departamento de Fisiología, Facultad de Medicina, Universidad Autónoma de Madrid, Madrid 28029, Spain*

*4 Departamento de Física de Materiales, Facultad de Ciencias, Universidad Autónoma de Madrid, Madrid 28049, Spain*

*5 Institute for Materials Science (ICMUV), University of Valencia, 46980 Valencia, Spain*

*6 Departamento de Química Inorgánica, Facultad de Ciencias,* *Universidad Autónoma de Madrid, Madrid 28049, Spain*

*7 Institute for Advanced Research of Chemistry (IAdChem), Facultad de Ciencias, Universidad Autónoma de Madrid, Madrid 28049, Spain*

*Email: [daniel.jaque@uam.es](mailto:daniel.jaque@uam.es); [bjrubio@ucm.es](mailto:bjrubio@ucm.es)

Section S1.- Table S1. Representative examples of multifunctional implants obtained by combination with luminescent probes.

| **Host material** | **Luminescent nanoprobe** | **(nm)** | **(nm)** | **Sensing** | **Application** | **Ref.** |
| --- | --- | --- | --- | --- | --- | --- |
| PLA matrix | Cr3+ doped nanoparticles | 500 | 700 | No | In vivo imaging | 5 |
| 3D printed Bioactive glass | Er3+ doped nanoparticles and infrared emitting dye | 980  1064 | 1550  1150 | Yes, inflammation | Monitoring of bone regeneration | 6 |
| Polyacrylamide hydrogel | Polymer dots | 450 | 670 | Yes, Glucose | In vivo Glucose monitoring | 7 |
| PEG-polymer | croconate dye | 680 | 780 | No | In vivo imaging | 8 |
| Natural silk | Er:Yb nanoparticles | 980 | 1550 | No | In vivo imaging | 9 |
| PLGA/NMP oleosol | ZGC nanoparticles | 600 | 700 | No | Tumor treatment | 10 |
| PCLG copolymers | ZW800-1C infrared fluorophore | 685  785 | 720  820 | No | Bone regeneration | 11 |
| Olycaprolactone ink | NIR-II dye | 700 | 1000 | No | Imaging | 12 |
| PEGDA hydrogel | Carbon nanotubes | 700 | 1000 | No | Body response | 13 |
| Polymer | ICG dye | 745 | 850 | No | 3D localization | 14 |
| PLGA polymer | Upconverting nanoparticles | 745 | 840 | No | Imaging | 15 |
| poly(lactic-co-glycolic acid)/N-methylpyrrolidone | Upconverting nanoparticles | 980 | 700 | No | Repetitive Phototherapy | 16 |
| ---- | aggregation-induced emission-active luminogen | 365 | 525 | No | bioimaging and antibacterial | 17 |

Section S2. Transmission Electron Microscopy (TEM) images of Nd,Yb:NPs


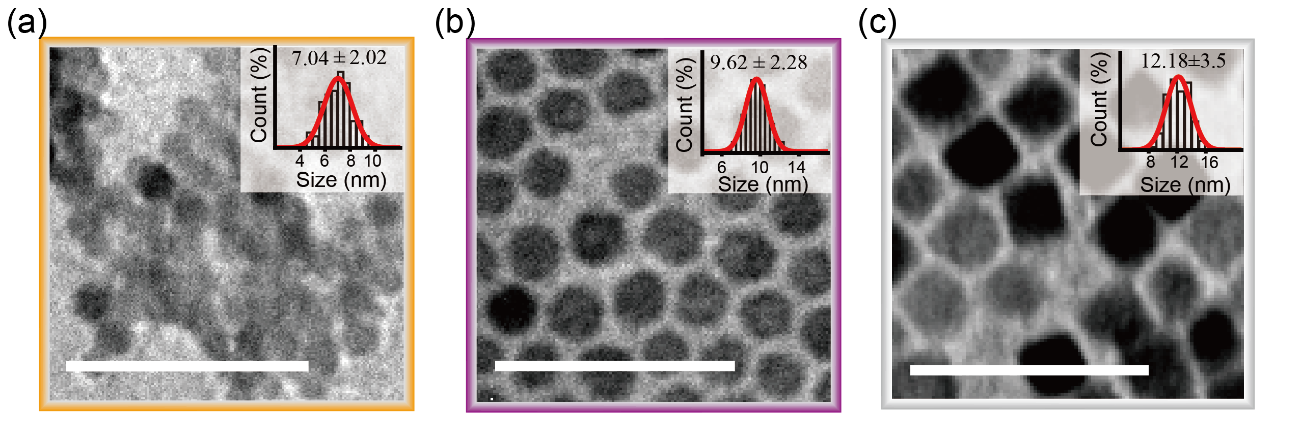


**Figure S1.-** Transmission Electron Microscopy (TEM) images of NaYF4 **(a)**, NaYF4@NaYF4:Yb20,Nd60 **(b)** and NaYF4@NaYF4:Yb20,Nd60@CaF2 **(c)** NPs, respectively and their representative size distribution. The scales in all the graphs are 50 nm.

Section S3. Mechanical properties of stent


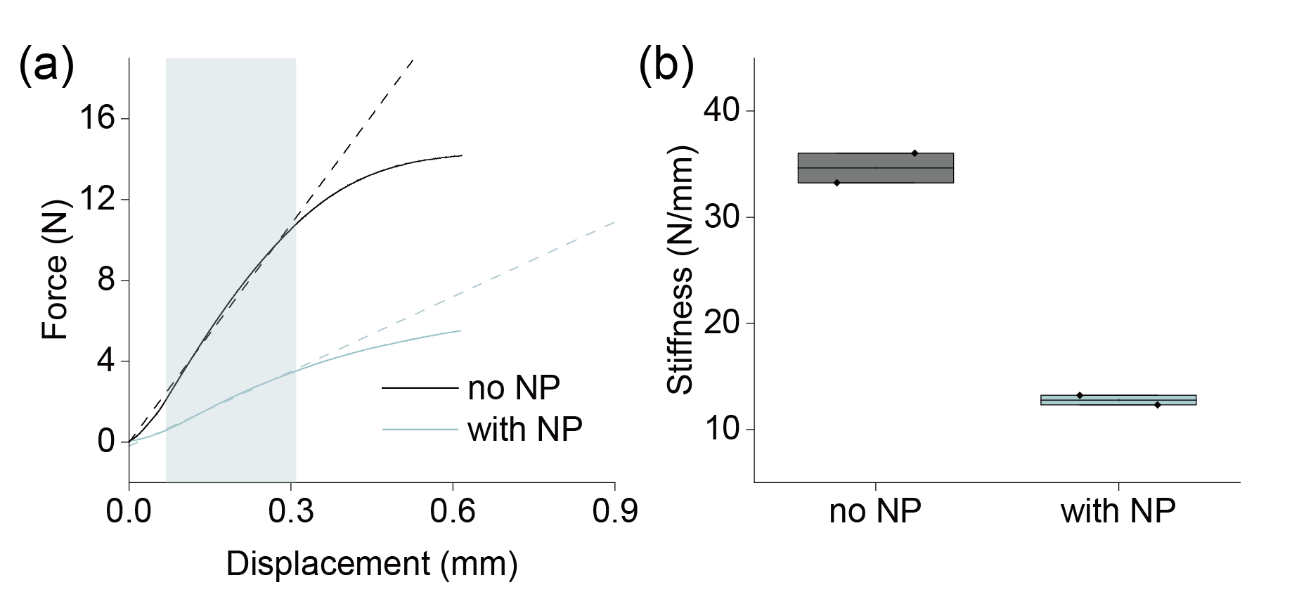


**Figure S2.-** **(a)** Force/displacement curves corresponding to the stents with and without Ln:NPs. The dashed lines are the linear fits used for the calculation of the stiffness of the implants. **(b)** Stiffness obtained for the 3D printed stents with and without the incorporation of the Ln:NPs.

Section S4. Fluorescent stent operating at 1.5 µm.


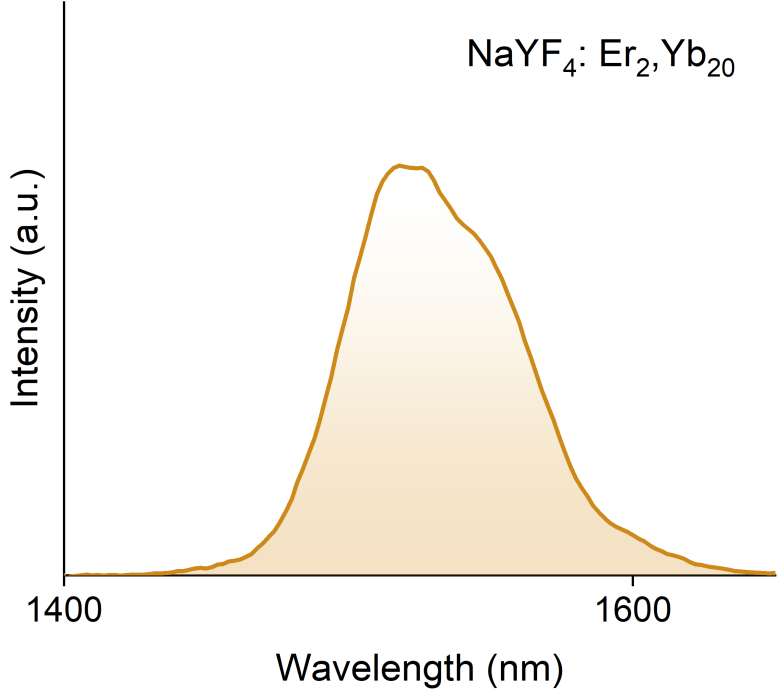


**Figure S3.-** Stent incorporating Er,Yb co-doped nanoparticles resulting in fluorescence operating at 1.5 µm.

The emission spectra were collected under 980 nm continue wavelength laser irradiation and 850 nm long-pass filter (FEL850 Thorlabs) was used to remove the laser contribution. The luminescence was acquired with a NIR Quest spectrometer (900-2500 nm wavelength) from Ocean Insight.

Section S5. Stent detaching simulation

A motion representative of a 3D printed luminescent stent-detaching event was simulated by pushing the stent from the beginning to the end within the tubing (20 cm) with a catheter. The experimental setup was identical to that used previously for penetration depth measurements. The stent within the tubing was placed on a platform after covered with 0.5 cm thick chicken breast tissue, the fluorescent images of stent at different positions within the tubing were collected by a InGaAs camera that contains an 850 nm long pass filter while 800 nm laser irradiation. A fluorescence video (see **Video S1**) that mimicked the process of stent detachment was made using approximately 40 images.

**Video S1.-** A fluorescence video mimicked the process of stent detachment.

Section S6. The effect of the physiological environment for the signal of the stent


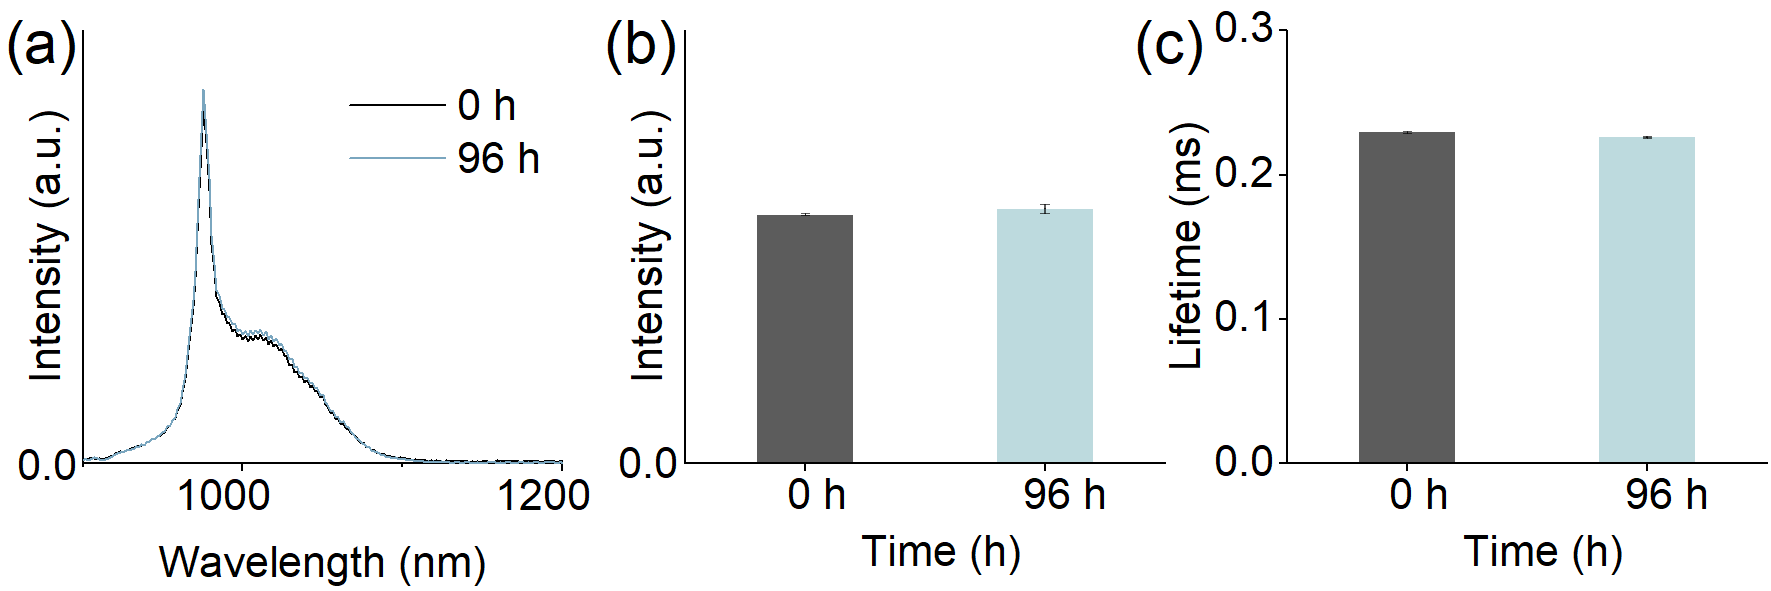


**Figure S4.-** Emission spectra **(a)**, integrated emitted intensity **(b)** and fluorescence lifetime **(c)** of a fresh stent (0 h) and for a stent store at 37 ºC during 96 h (96 h).

To evaluate the optical stability of the sample under physiological conditions, we stored stent in fetal bovine serum (FBS) from 0 and 96 hours and recorded its fluorescence emission spectra and fluorescence decay curves at 980 nm under 800 nm laser excitation. The results showed that the emission profiles remained essentially unchanged, with no noticeable peak shifts. Additionally, the average fluorescence lifetime calculated from the decay curves at 980 nm exhibited changes within the experimental error range, with no statistically significant difference. These findings indicate that the sample maintains good optical stability under simulated physiological conditions. After 5 days of storage in FBS, the fluorescence signal remained stable, suggesting that the physiological environment has minimal impact on its fluorescence performance, and the sample holds promising potential for further biological applications.

Section S7. Performance Comparison of Lifetime-based Luminescence Nanothermometer in Aqueous Solution for bio application

**Table S2.-** Performance Comparison of Lifetime-based Luminescence Nanothermometer in Aqueous Solution for bio application.

| **Nanothermometers** | **λexc(nm)** | **λem(nm)** | **Thermal Sensitivity** | **Ref.** |
| --- | --- | --- | --- | --- |
| NaYF4@NaYF4:Yb3+, Nd3+@CaF2 | 800 | 980 | 1.2% ℃-1 (20℃) | 35 |
| NaNdF4:Yb@CaF2 | 785 | 975 | 2.07% K-1 (25℃) | 45 |
| NaYF4: Yb3+, Tm3+@NaYF4 | 976 | 800 | 0.92% K-1 (70℃) | 46 |
| NaNdF4:7%Yb,33%Y@NaYF4@  NaYbF4:2% Er,2%Ce@NaYF4 | 793 | 980 | 1.94% K-1 (25.8℃) | 47 |
| NaYF4@NaYF4:Yb/Nd@NaYF4 | 808 | 980 | 1.32% ℃-1 (20℃) | 48 |
| LiYbF4@LiYbF4: 2Er,1Ce@ LiYF4 | 980 | 1532 | 0.36% ℃-1 (20℃) | 49 |
| NaYF4@NaYF4:Yb3+, Nd3+@CaF2 | 800 | 980 | 0.58% ℃-1 (45℃) | This work |

Section S8. Experimental uncertainty in the determination of ( 0.2 µs)


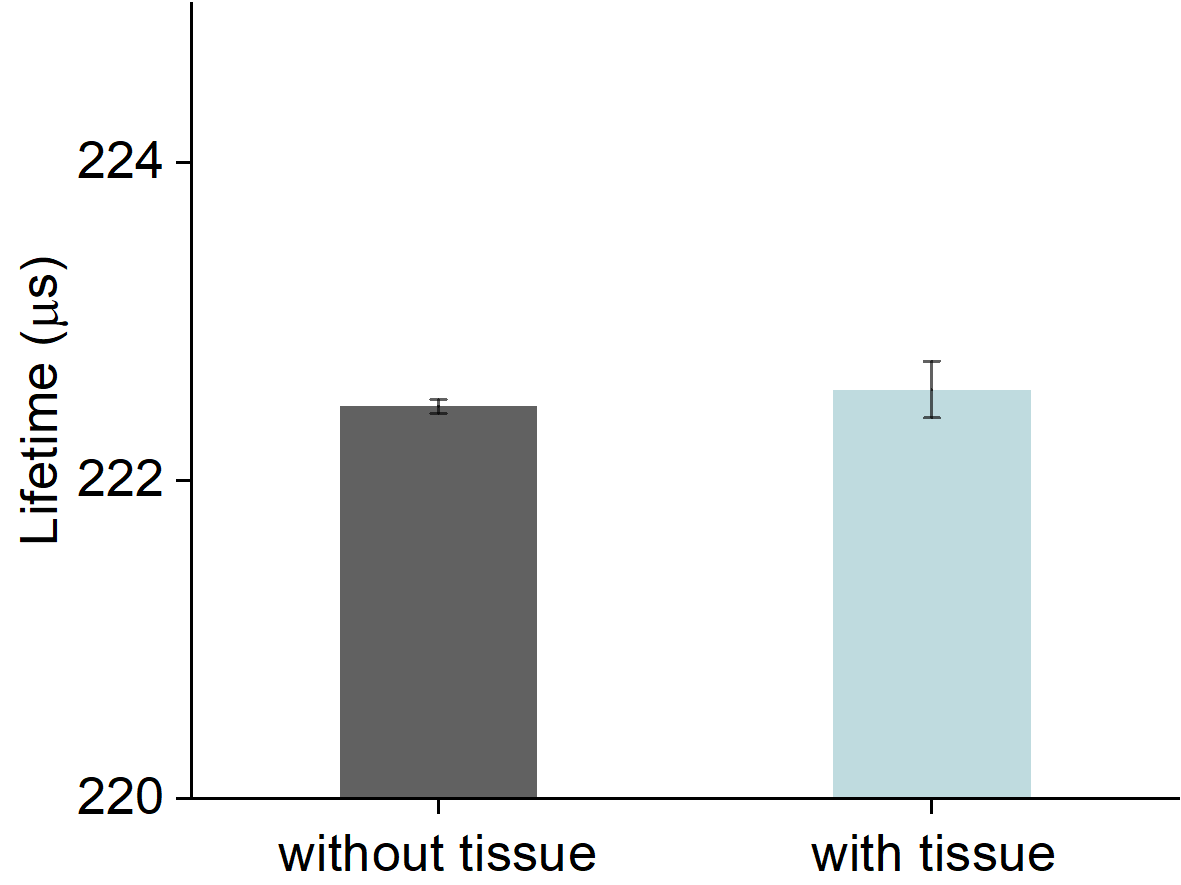


**Figure S5.-** Average lifetime of the stent surrounded with and without tissue, excitation and emission wavelengths were 800 nm and 980 nm, respectively.

The fluorescence lifetime of the stent was measured under two conditions: without tissue coverage and with tissue coverage. To assess the experimental uncertainty, 10 parallel measurements were performed for each condition, and the standard deviation was calculated. During data analysis, the fluorescence lifetime was obtained by fitting the fluorescence decay curve with an exponential function. For each experimental condition, the standard deviation of 10 independent measurements was calculated, and the maximum value was taken as the experimental uncertainty. The results show that the standard deviation of both groups was less than 0.2 μs. Therefore, the measurement uncertainty in this experiment is determined as: 0.2 µs.

Section S9. Simulations of thermal response time to assess the time evolution of intra-tubbing temperature after switching on the 1450 nm laser.

Regarding the thermal response time, we have conducted some simulations to assess the time evolution of intra-tubbing temperature after switching on the 1450 nm laser. Results are included in **Figure S6** that includes the time evolution of local temperature as obtained at the center of the tubbing (i.e. at the position of the catheter, red line) and at the position of the stent (200 µm from the internal surface of the stent). Simulations revealed that, in both cases, 90% of the final heating is achieved during the first 50 s after switching on the 1450 nm laser. Cooling process follows similar dynamics and 90% of the cooling is produced within the first 50 s after switching off the 1450 nm laser. The thermal measurements included in our manuscript were achieved 5 mins after switching on the 1450 nm laser, i.e. when intra-tubbing temperature had achieved its steady state value.


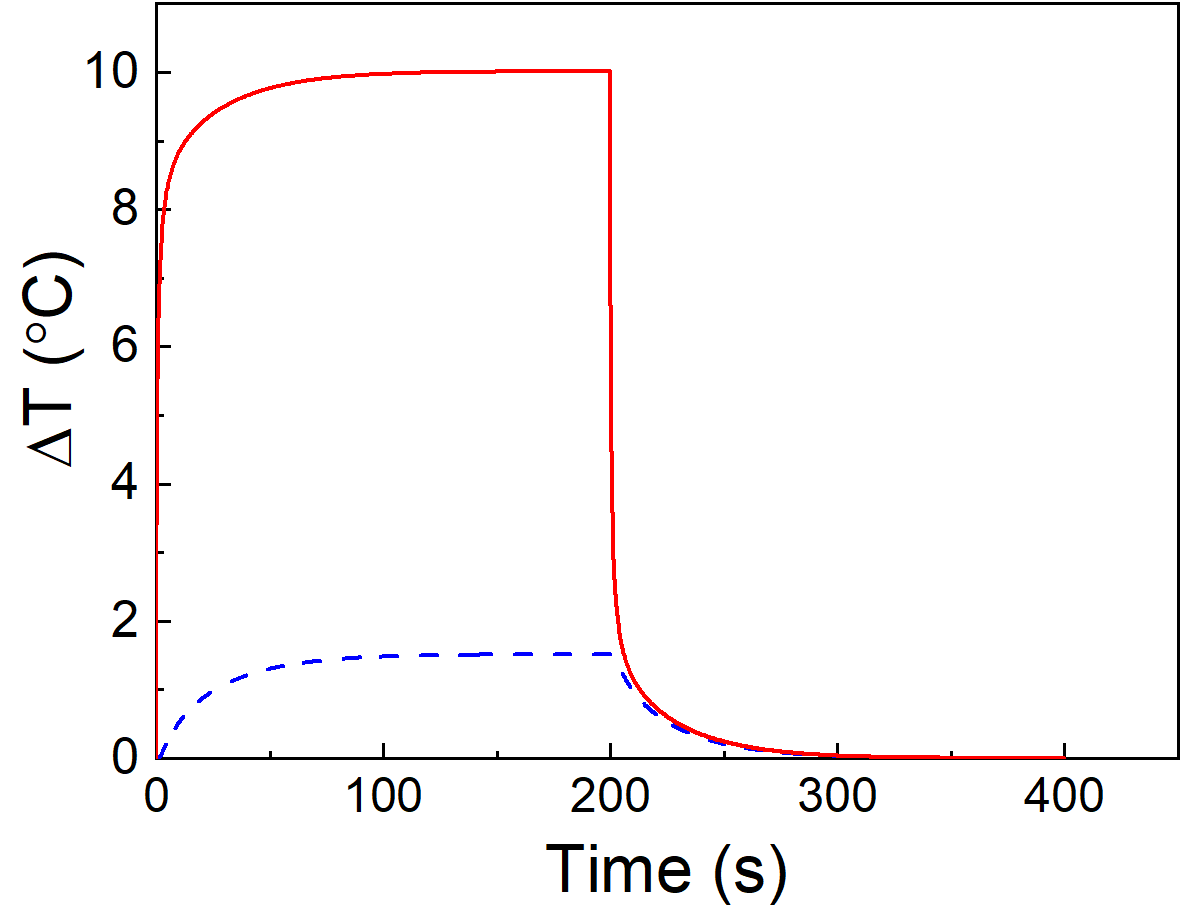


**Figure S6.-**Time evolution of intra-tubing temperature following the activation of the 1450 nm laser at 𝑡 = 0 s and its deactivation at 𝑡 = 200 s. The simulated temperature increase is shown for two key locations: the center of the tube where the catheter is positioned (red line) and the stent location (blue line).

Section S10. Numerical simulations of the internal temperature distributions of fiber-assisted photothermal treatment

The temperature data of the stent in the plastic tube after laser heating were simulated by numerically solving the 3D-heat transfer equation, which allows to describe the heat flow in inhomogeneous media.53 This equation relates the space and time partial derivatives of the local temperature in an object with the energy deposited by heat sources and energy loss into the surrounding medium.53 The heat transfer equation for inhomogeneous media reads as:

(**S1**)

Here, *T* is the local temperature (in K), *t* the time (in s),** is the mass density (in kg·m-3), *c* is the specific heat capacity (in J/kg·K),** is thermal conductivity (in W·m-1·K-1), and *qv* is the externally supplied power per unit volume (in W·m-3). **Equation S1**, besides the appropriate boundary conditions to consider energy loss into the surrounding medium, has been solved numerically by a 3D-finite difference scheme using the Douglas-Gunn method, which provides a stable algorithm that is second order accurate in both time and space derivatives.54 Details of the numerical method used to perform the calculations can be found in **Table S3** in of Supporting Information.55

In our case, the object under study is a cylinder full of a liquid, opened in its two faces, surrounded by a medium at a fixed temperature. The temperature increase in the object is provided by the thermal energy deposition supplied by a laser, while the energy loss mechanism is provided by the cylinder wall in thermal contact to the external medium. As the penetration depth of the laser beam at 1450 nm wavelength is very short, the deposited energy can be assumed to be well localized at the cylinder longitudinal axis. **Table S3** and **Table S4** list the physical parameters, and the simulation parameters used for numerical calculations.

**Table S3**.- Materials’ parameters used to perform numerical simulations in the heat equation.

| **Symbol** | **Magnitude** | **Units** | **Value** | **Ref.** |
| --- | --- | --- | --- | --- |
| Water (295 K) | | | | |
| *w* | Density | kg/m3 | 1000 | - |
| *cw* | Specific heat | kJ/kg·K | 4.18 | 56 |
| *w* | Thermal conductivity | W/K·m | 0.60 | 57 |
| Plastic tube | | | | |
| *p* | Density | kg/m3 | 1350 | 58 |
| *cp* | Specific heat | kJ/kg·K | 0.88 | 59 |
| *p* | Thermal conductivity | W/K·m | 0.19 | 60 |

**Table S4.-** Simulation parameters.

| **Symbol** | **Magnitude** | **Unit** | **Value** |
| --- | --- | --- | --- |
| *R* | Cylinder outer radius | m | 3.9´10-3 |
| *r* | Cylinder inner radius | m | 2.3´10-3 |
| *Ts* | Surrounding temperature | K | 295 |
| D*x*, D*y,* D*z* | Grid spacing | m | 0.12´10-3 |
| D*t* | Time step | s | 0.05 |
| *P* | Supplied power | mW | 0 - 20 |

Section S11. Thermal Images of the stent within the tube in presence and absence of tissue.


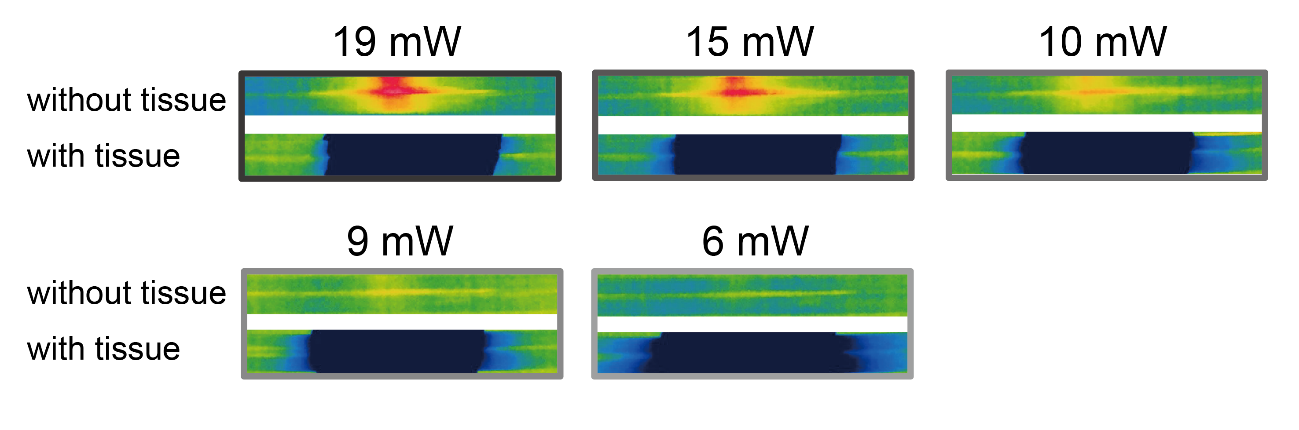


**Figure S7.-** Thermal images of the stent within the tubing, surrounded by chicken breast tissue (0.5 cm), under 1450 nm laser heating at different power intensities. Note that the presence of the tissue prevents access to the actual temperature inside the tube.
